# Supplementary material for: An Integrated Strategy to Study Muscle Development and Myofilament Structure in Caenorhabditis elegans
Source: PLoS Genet. 2009 Jun 26;5(6):e1000537. doi: 10.1371/journal.pgen.1000537 (PMC2694363; doi:10.1371/journal.pgen.1000537)
Supplement: Dataset S6 — A comprehensive list of all genes identified in both RNAi screens. (0.23 MB XLS) [file pgen.1000537.s007.xls]

## Sheet: myofilament screen
Dataset S6. Genes identified by RNAi
Muscle affecting genes identified by RNAi screen for myofilament defects (known muscle affecting genes are highlighted in bold)
Genes are grouped according to the myofilament defects scored (1 = yes, 0 = no):
			Category 3 clumps: big aggregations/clumps
			Category 2 aggregates: small aggregations, mostly organized across the filaments
			Category 1 disorganized: general myofilament disorganziation with minor disruptions and/or aggregations
Sequence Name	Gene Name (CGC)	clumps	aggregates	disorganized	CDS Description	Human Ensembl Gene ID	CDS Remarks
C47E8.7	unc-112	1	1	0	Mitogen inducible MIG-2 protein like	ENSG00000073712	contains similarity to Pfam domain PF00169 PH domaincontains similarity to Interpro domains IPR001849 (Pleckstrin-like), IPR000299 (Band 4.1, N-terminal)
Category 3
C14F5.3	tnt-3	1	0	0	Troponin T	ENSG00000118194	contains similarity to Lonomia obliqua Troponin I 1.; TR:Q5MGI3
C29F9.7	pat-4	1	0	0	Integrin-linked kinase		contains similarity to Pfam domains PF00069 (Protein kinase domain), PF00023 (Ankyrin repeat)(3)contains similarity to Interpro domains IPR002290 (Serine/threonine protein kinase), IPR002110 (Ankyrin), IPR001245 (Tyrosine protein kinase), IPR000719 (Protein kinase, core)
T21D12.4	pat-6	1	0	0	Alpha-parvin and related focal adhesion proteins	ENSG00000188677	contains similarity to Pfam domain PF00307 Calponin homology (CH) domaincontains similarity to Interpro domain IPR001715 (Calponin-like actin-binding)
ZK1151.1	vab-10	1	0	0	spectraplakin		contains similarity to Pfam domains PF00435 (Spectrin repeat)(2), PF00307 (Calponin homology (CH) domain)(2), PF00018 (SH3 domain)contains similarity to Interpro domains IPR012153 (Protein-tyrosine phosphatase, non-receptor type-13), IPR001101 (Plectin repeat), IPR012011 (von Willebrand factor), IPR006228 (Polycystin cation channel), IPR001715 (Calponin-like actin-binding), IPR001589 (Actin-bindi…
C09D1.1	unc-89	1	0	0	Immunoglobin-like protein		contains similarity to Pfam domains PF07686 (Immunoglobulin V-set domain)(16), PF00047 (Immunoglobulin domain)(36), PF07653 (Variant SH3 domain), PF00621 (RhoGEF domain), PF02818 (PPAK motif), PF00169 (PH domain), PF05177 (RCSD region)(5), PF00041 (Fibronectin type III domain), PF07679 (Immunoglobulin I-set domain)(51), PF00018 (SH3 domain)contains similarity to Interpro domains IPR003596 (Immuno…
T04C12.4	act-3	1	0	0	Actin	ENSG00000159251	contains similarity to Pfam domain PF00022 Actincontains similarity to Interpro domains IPR004000 (Actin/actin-like), IPR004001 (Actin)
C05D9.3		1	0	0	Integrin beta subunit (N-terminal portion of extracellular region)		contains similarity to Pfam domain PF07974 EGF-like domaincontains similarity to Interpro domains IPR002369 (Integrin beta subunit, N-terminal), IPR001169 (Integrin beta subunit, C-terminal), IPR015812 (Integrin beta subunit), IPR012012 (Integrin beta subunit, subgroup), IPR003659 (Plexin/semaphorin/integrin), IPR013032 (EGF-like region), IPR013111 (EGF, extracellular)
C52B11.2	tag-303	1	0	0	Potassium channel protein	ENSG00000180901	contains similarity to Pfam domain PF02214 K+ channel tetramerisation domaincontains similarity to Interpro domains IPR000210 (BTB/POZ-like), IPR003131 (K+ channel tetramerisation)
F25H5.1	lim-9	1	0	0	LIM domain containing proteins (6 domains)		contains similarity to Pfam domains PF06297 (PET Domain), PF00412 (LIM domain)(5)contains similarity to Interpro domains IPR010442 (PET), IPR001781 (LIM, zinc-binding)
F55D10.1	aman-1	1	0	0	Alpha-mannosidase	ENSG00000104774	contains similarity to Pfam domains PF07748 (Glycosyl hydrolases family 38 C-terminal domain), PF01074 (Glycosyl hydrolases family 38 N-terminal domain), PF09261 (Alpha mannosidase, middle domain)contains similarity to Interpro domains IPR015341 (Glycoside hydrolase, family 38, central region), IPR011682 (Glycosyl hydrolases 38, C-terminal), IPR000602 (Glycoside hydrolase, family 38, core)
Y113G7B.7	fbxa-114	1	0	0			contains similarity to Pfam domains PF01827 (FTH domain), PF00646 (F-box domain)contains similarity to Interpro domains IPR002900 (Protein of unknown function DUF38, Caenorhabditis species), IPR001810 (Cyclin-like F-box)
C56C10.3	vps-32.1	1	0	0	Protein involved in glucose derepression and pre-vacuolar endosome protein sorting	ENSG00000100931	contains similarity to Pfam domain PF03357 Snf7contains similarity to Interpro domain IPR005024 (Snf7)
C50F4.7	his-37	1	0	0	Histone H4	ENSG00000198339	contains similarity to Pfam domain PF00125 Core histone H2A/H2B/H3/H4contains similarity to Interpro domains IPR007125 (Histone core), IPR001951 (Histone H4)
Category 2
C18A11.7	dim-1	0	1	0	Immunoglobin and related proteins		contains similarity to Pfam domains PF00047 (Immunoglobulin domain), PF07679 (Immunoglobulin I-set domain)(3)contains similarity to Interpro domains IPR003596 (Immunoglobulin V-set, subgroup), IPR007110 (Immunoglobulin-like), IPR003599 (Immunoglobulin subtype), IPR003598 (Immunoglobulin subtype 2), IPR013098 (Immunoglobulin I-set), IPR013783 (Immunoglobulin-like fold), IPR003006 (Immunoglobulin/m…
Y105E8A.6	unc-95	0	1	0	Adaptor protein Enigma and related PDZ-LIM proteins		contains similarity to Pfam domain PF00412 LIM domaincontains similarity to Interpro domain IPR001781 (LIM, zinc-binding)
F07A5.70	unc-15	0	1	0	Paramyosin		contains similarity to Pfam domain PF01576 Myosin tailcontains similarity to Interpro domains IPR008263 (Glycoside hydrolase, family 16, active site), IPR002928 (Myosin tail)
F39B2.4	sur-2	0	1	0	SUR-2 PROTEIN	ENSG00000112282	contains similarity to Danio rerio Cofactor required for Sp1 transcriptional activation, subunit 3.; TR:Q68EG9
F46H6.2	dgk-2	0	1	0	Diaglycerol kinase	ENSG00000153933	contains similarity to Pfam domains PF00609 (Diacylglycerol kinase accessory domain), PF00781 (Diacylglycerol kinase catalytic domain (presumed)), PF00130 (Phorbol esters/diacylglycerol binding domain (C1 domain))(2)contains similarity to Interpro domains IPR005218 (Conserved hypothetical protein 147), IPR000756 (Diacylglycerol kinase accessory region), IPR001206 (Diacylglycerol kinase, catalytic…
C43E11.9		0	1	0	Ribosome biogenesis protein NIP7	ENSG00000132603	contains similarity to Pfam domain PF03657 Uncharacterised protein family (UPF0113)contains similarity to Interpro domains IPR002478 (PUA), IPR005155 (Ribosome biogenesis factor NIP7-like)
F47F2.1		0	1	0	Protein kinase	ENSG00000183943	contains similarity to Pfam domain PF00069 Protein kinase domaincontains similarity to Interpro domains IPR012233 (Protein kinase C, zeta/iota), IPR002290 (Serine/threonine protein kinase), IPR001245 (Tyrosine protein kinase), IPR008271 (Serine/threonine protein kinase, active site), IPR000719 (Protein kinase, core), IPR000961 (Protein kinase, C-terminal)
T27E9.2		0	1	0	Ubiquinol-cytochrome c reductase complexn 11 KD protein	ENSG00000173660	contains similarity to Pfam domain PF02320 Ubiquinol-cytochrome C reductase hinge proteincontains similarity to Interpro domain IPR003422 (Ubiquinol-cytochrome C reductase hinge)
C02F5.12		0	1	0	C2H2 zinc-finger		contains similarity to Interpro domain IPR007087 (Zinc finger, C2H2-type)
C27A12.9		0	1	0	Glycosylphosphatidylinositol anchor synthesis protein [	ENSG00000165282	contains similarity to Pfam domain PF01663 Type I phosphodiesterase / nucleotide pyrophosphatasecontains similarity to Interpro domains IPR002591 (Type I phosphodiesterase/nucleotide pyrophosphatase), IPR001952 (Alkaline phosphatase)
C41G7.1	smn-1	0	1	0	Human muscular atrophy protein like	ENSG00000172062	contains similarity to Pfam domain PF06003 Survival motor neuron protein (SMN)contains similarity to Interpro domains IPR002999 (Tudor), IPR010304 (Survival motor neuron)
F20D6.10		0	1	0			contains similarity to Entamoeba invadens Jacob 6.; TR:Q2LEB7
F52A8.1		0	1	0			contains similarity to Mycobacterium phage PMC Gp72.; TR:Q19YI1
F57B10.7	tre-1	0	1	0	Glycosyl hydrolase	ENSG00000118094	contains similarity to Pfam domain PF01204 Trehalasecontains similarity to Interpro domain IPR001661 (Glycoside hydrolase, family 37)
K07G5.1	crml-1	0	1	0	Leucine Rich Repeat (2 copies) (4 domains)	ENSG00000079691	contains similarity to Pfam domain PF00560 Leucine Rich Repeatcontains similarity to Interpro domains IPR001611 (Leucine-rich repeat), IPR003590 (Leucine-rich repeat, ribonuclease inhibitor subtype), IPR000694 (Proline-rich region)
T10B11.1	pcbd-1	0	1	0		ENSG00000166228	contains similarity to Pfam domain PF01329 Pterin 4 alpha carbinolamine dehydratasecontains similarity to Interpro domain IPR001533 (Transcriptional coactivator/pterin dehydratase)
T10B11.6		0	1	0	Uncharacterized conserved protein	ENSG00000126106	contains similarity to Pfam domain PF05705 Eukaryotic protein of unknown function (DUF829)contains similarity to Interpro domain IPR008547 (Protein of unknown function DUF829, eukaryotic)
T25G3.3		0	1	0	Yeast nonsense-mediated mRNA decay protein like	ENSG00000169251	contains similarity to Pfam domain PF04981 NMD3 familycontains similarity to Interpro domain IPR007064 (NMD3)
W04C9.4		0	1	0			contains similarity to Tetrahymena thermophila SB210 C2 domain containing protein.; TR:Q22YY2
F58E10.1		0	1	0			contains similarity to Saccharomyces cerevisiae Nucleolar, serine-rich protein with a role in preribosome assembly or transport; may function as a chaperone of small nucleolar ribonucleoprotein particles (snoRNPs); immunologically and structurally to rat Nopp140; SGD:YKR092C
D1007.4		0	1	0			contains similarity to Homo sapiens Gem-associated protein 6; ENSEMBL:ENSP00000281950
C44H4.4		0	1	0	Uncharacterized conserved protein	ENSG00000065060	contains similarity to Mus musculus MKIAA4127 protein (Fragment).; TR:Q570Z6
Category 1
F30H5.1	unc-45	0	0	1	P59 protein and TPR domain	ENSG00000141161	contains similarity to Pfam domains PF07719 (Tetratricopeptide repeat), PF00515 (Tetratricopeptide repeat)(2)contains similarity to Interpro domains IPR013026 (Tetratricopeptide region), IPR011236 (Protein phosphatase 5), IPR011990 (Tetratricopeptide-like helical), IPR011989 (Armadillo-like helical), IPR001440 (Tetratricopeptide TPR_1), IPR013105 (Tetratricopeptide TPR_2)
F32F2.1	uig-1	0	0	1	Guanine nucleotide exchange factor for Rho/Rac/Cdc42-like GTPases		contains similarity to Pfam domain PF00621 RhoGEF domaincontains similarity to Interpro domains IPR000219 (DH), IPR001849 (Pleckstrin-like), IPR011993 (Pleckstrin homology-type), IPR001331 (Guanine-nucleotide dissociation stimulator, CDC24)
H14N18.1	unc-23	0	0	1	BAG family molecular chaperone regulator 2	ENSG00000112208	contains similarity to Pfam domain PF02179 BAG domaincontains similarity to Interpro domains IPR003103 (Apoptosis regulator Bcl-2 protein, BAG), IPR000694 (Proline-rich region)
K07D8.1	mup-4	0	0	1	Fibrillins and related proteins containing Ca2+-binding EGF-like domains		contains similarity to Pfam domains PF00008 (EGF-like domain)(6), PF01390 (SEA domain)(2), PF07645 (Calcium binding EGF domain)(3), PF00092 (von Willebrand factor type A domain), PF07974 (EGF-like domain)contains similarity to Interpro domains IPR000152 (Aspartic acid and asparagine hydroxylation site), IPR000082 (SEA), IPR001881 (EGF-like calcium-binding), IPR002035 (von Willebrand factor, type …
F20G4.3	nmy-2	0	0	1	Myosin heavy chain		contains similarity to Pfam domains PF01576 (Myosin tail), PF02736 (Myosin N-terminal SH3-like domain), PF00063 (Myosin head (motor domain))contains similarity to Interpro domains IPR004009 (Myosin, N-terminal, SH3-like), IPR002928 (Myosin tail), IPR000048 (IQ calmodulin-binding region), IPR001609 (Myosin head, motor region)
R31.1	sma-1	0	0	1	Spectrin beta chain		contains similarity to Pfam domains PF00435 (Spectrin repeat)(28), PF07653 (Variant SH3 domain), PF00169 (PH domain), PF00307 (Calponin homology (CH) domain)(2), PF00018 (SH3 domain)contains similarity to Interpro domains IPR011370 (DNA recombination repair protein, BRCA2), IPR012011 (von Willebrand factor), IPR006228 (Polycystin cation channel), IPR001715 (Calponin-like actin-binding), IPR001589…
C32B5.16	sdz-4	0	0	1	F-box domain		contains similarity to Aedes aegypti Protein phosphatases pp1 regulatory subunit.; TR:Q17M29
D2030.3		0	0	1			contains similarity to Dictyostelium discoideum AX4 Myosin.; TR:Q54HG3
F20H11.3	mdh-1	0	0	1	Malate dehydrogenase	ENSG00000146701	contains similarity to Pfam domains PF00056 (lactate/malate dehydrogenase, NAD binding domain), PF02866 (lactate/malate dehydrogenase, alpha/beta C-terminal domain)contains similarity to Interpro domains IPR011272 (Lactate dehydrogenase), IPR011275 (Malate dehydrogenase, NAD-dependent), IPR011274 (Malate dehydrogenase, NAD-dependent, cytosolic), IPR010097 (Malate dehydrogenase, NAD-dependent, euk…
ZK353.7		0	0	1	Predicted Cu2+ homeostasis protein CutC	ENSG00000119929	contains similarity to Pfam domain PF03932 CutC familycontains similarity to Interpro domain IPR005627 (CutC)
B0336.3		0	0	1	Proteins containing the RNA recognition motif		contains similarity to Pfam domain PF00642 Zinc finger C-x8-C-x5-C-x3-H type (and similar)contains similarity to Interpro domains IPR000571 (Zinc finger, CCCH-type), IPR000694 (Proline-rich region), IPR012677 (Nucleotide-binding, alpha-beta plait), IPR000504 (RNA recognition motif, RNP-1)
C01G8.5	erm-1	0	0	1	Radixin, moesin and related proteins of the ERM family	ENSG00000137710	contains similarity to Pfam domains PF00769 (Ezrin/radixin/moesin family), PF00373 (FERM central domain)contains similarity to Interpro domains IPR012151 (Protein-tyrosine phosphatase, non-receptor type-3, -4), IPR000798 (Ezrin/radixin/moesin ERM), IPR011993 (Pleckstrin homology-type), IPR014352 (FERM-type 3-helical bundle), IPR011174 (Ezrin/radixin/moesin), IPR011259 (Ezrin/radixin/moesin, C-ter…
F22A3.2		0	0	1			contains similarity to Pfam domain PF01060 Transthyretin-like familycontains similarity to Interpro domain IPR001534 (Transthyretin-like)
F42C5.9		0	0	1	Actin and related proteins		contains similarity to Pfam domain PF00022 Actincontains similarity to Interpro domains IPR004000 (Actin/actin-like), IPR001849 (Pleckstrin-like)
R09E10.7	pqn-55	0	0	1	Uncharacterized conserved protein	ENSG00000214655	contains similarity to Pfam domain PF04434 SWIM zinc fingercontains similarity to Interpro domain IPR007527 (Zinc finger, SWIM-type)
T06A10.3		0	0	1	Uncharacterized conserved protein		contains similarity to Pfam domain PF05253 Uncharacterised protein family (UPF0224)contains similarity to Interpro domain IPR007917 (Protein of unknown function UPF0224)
T09A5.12		0	0	1	Zinc finger, C2H2 type (2 domains)		contains similarity to Interpro domain IPR007087 (Zinc finger, C2H2-type)
B0024.10		0	0	1		ENSG00000169696	contains similarity to Xenopus laevis LOC495145 protein.; TR:Q5XGT6
B0336.11		0	0	1		ENSG00000130150	contains similarity to Pfam domains PF00650 (CRAL/TRIO domain), PF00635 (MSP (Major sperm protein) domain)contains similarity to Interpro domains IPR008962 (PapD-like), IPR002048 (Calcium-binding EF-hand), IPR001251 (Cellular retinaldehyde-binding/triple function, C-terminal), IPR000535 (Major sperm protein), IPR000886 (Endoplasmic reticulum targeting sequence)
B0336.8	lgg-3	0	0	1	Protein conjugation factor involved in autophagy	ENSG00000145782	contains similarity to Pfam domain PF04110 Ubiquitin-like autophagy protein Apg12contains similarity to Interpro domain IPR007242 (Autophagy protein Apg12)
B0412.3		0	0	1	Uncharacterized conserved protein	ENSG00000168538	contains similarity to Pfam domain PF07919 Protein of unknown function (DUF1683)contains similarity to Interpro domain IPR012880 (Protein of unknown function DUF1683, C-terminal)
C02F5.7		0	0	1	Glucose-induced repressor	ENSG00000108306	contains similarity to Pfam domains PF00560 (Leucine Rich Repeat)(3), PF07723 (Leucine Rich Repeat)(2), PF00646 (F-box domain)contains similarity to Interpro domains IPR006553 (Leucine-rich repeat, cysteine-containing subtype), IPR001611 (Leucine-rich repeat), IPR013101 (Leucine-rich repeat 2), IPR001810 (Cyclin-like F-box), IPR003590 (Leucine-rich repeat, ribonuclease inhibitor subtype)
C06E1.10	rha-2	0	0	1	ATP-dependent RNA helicase	ENSG00000150990	contains similarity to Pfam domains PF07717 (Domain of unknown function (DUF1605)), PF00271 (Helicase conserved C-terminal domain), PF04408 (Helicase associated domain (HA2))contains similarity to Interpro domains IPR014021 (Helicase superfamily 1 and 2 ATP-binding), IPR007502 (Helicase-associated region), IPR001650 (Helicase, C-terminal), IPR002464 (ATP-dependent helicase, DEAH-box), IPR011709 (…
C08B11.3		0	0	1	Zinc finger, C2H2 type		contains similarity to Pfam domain PF01388 ARID/BRIGHT DNA binding domaincontains similarity to Interpro domains IPR007087 (Zinc finger, C2H2-type), IPR001606 (AT-rich interaction region)
C10E2.2		0	0	1	F-box protein	ENSG00000163833	contains similarity to Interpro domains IPR001810 (Cyclin-like F-box), IPR001293 (Zinc finger, TRAF-type)
C15F1.7	sod-1	0	0	1	Superoxide dismutase	ENSG00000142168	contains similarity to Pfam domain PF00080 Copper/zinc superoxide dismutase (SODC)contains similarity to Interpro domains IPR001424 (Superoxide dismutase, copper/zinc binding), IPR011409 (Copper chaperone for superoxide dismutase)
C17G1.7		0	0	1	Cysteine synthase		contains similarity to Pfam domain PF00291 Pyridoxal-phosphate dependent enzymecontains similarity to Interpro domains IPR011820 (Threonine dehydratase), IPR005856 (Cysteine synthase K/M), IPR004450 (Threonine synthase), IPR005789 (Threonine dehydratase II), IPR001216 (Cysteine synthase/cystathionine beta-synthase P-phosphate-binding site), IPR005859 (Cysteine synthase A), IPR005857 (Cystathionin…
C27H6.4		0	0	1	Uncharacterized conserved protein	ENSG00000137824	contains similarity to Pfam domain PF07719 Tetratricopeptide repeatcontains similarity to Interpro domains IPR013026 (Tetratricopeptide region), IPR011990 (Tetratricopeptide-like helical), IPR013105 (Tetratricopeptide TPR_2)
C33D9.8		0	0	1			contains similarity to Trichomonas vaginalis G3 Viral A-type inclusion protein, putative.; TR:A2F531
C53B4.3		0	0	1		ENSG00000110628	contains similarity to Pfam domain PF07690 Major Facilitator Superfamilycontains similarity to Interpro domains IPR004751 (Drug antiporter protein), IPR001958 (Tetracycline-resistance protein, TetA-type), IPR011701 (Major facilitator superfamily MFS_1), IPR004744 (D-galactonate transporter), IPR004746 (Benzoate transport), IPR000849 (GlpT transporter), IPR007114 (Major facilitator superfamily)
C53B4.7	bre-1	0	0	1	GDP-mannose 4,6 dehydratase	ENSG00000112699	contains similarity to Pfam domain PF01370 NAD dependent epimerase/dehydratase familycontains similarity to Interpro domains IPR005888 (dTDP-glucose 4,6-dehydratase), IPR005886 (UDP-glucose 4-epimerase), IPR002198 (Short-chain dehydrogenase/reductase SDR), IPR013445 (CDP-glucose 4,6-dehydratase), IPR006368 (GDP-mannose 4,6-dehydratase), IPR001509 (NAD-dependent epimerase/dehydratase)
D1037.4	rab-8	0	0	1	RAS-related protein	ENSG00000167461	contains similarity to Pfam domains PF00071 (Ras family), PF08477 (Miro-like protein)contains similarity to Interpro domains IPR002041 (Ran GTPase), IPR003577 (Ras small GTPase, Ras type), IPR003578 (Ras small GTPase, Rho type), IPR001806 (Ras GTPase), IPR003579 (Ras small GTPase, Rab type), IPR006688 (ADP-ribosylation factor), IPR013684 (Miro-like), IPR005225 (Small GTP-binding protein domain), …
D2013.9	ttll-12	0	0	1	Tubulin-tyrosine ligase-related protein	ENSG00000100304	contains similarity to Pfam domain PF03133 Tubulin-tyrosine ligase familycontains similarity to Interpro domains IPR001214 (SET), IPR004344 (Tubulin-tyrosine ligase)
D2023.5		0	0	1	Thiosulphate sulphurtransferase	ENSG00000128311	contains similarity to Interpro domains IPR001763 (Rhodanese-like), IPR001307 (Thiosulfate sulfurtransferase)
DY3.2	lmn-1	0	0	1	Intermediate filament proteins (2 domains)		contains similarity to Pfam domains PF00932 (Intermediate filament tail domain), PF00038 (Intermediate filament protein)contains similarity to Interpro domains IPR001664 (Intermediate filament protein), IPR001322 (Intermediate filament, C-terminal)
F11A10.2		0	0	1	Splicing factor 3a, subunit 2	ENSG00000104897	contains similarity to Interpro domains IPR003604 (Zinc finger, U1-type), IPR000690 (Zinc finger, C2H2-type matrin), IPR007087 (Zinc finger, C2H2-type)
F11A10.4		0	0	1	Uncharacterized conserved protein	ENSG00000061987	contains similarity to Pfam domain PF02985 HEAT repeatcontains similarity to Interpro domain IPR000357 (HEAT)
F20D12.5	exc-9	0	0	1		ENSG00000213145	contains similarity to Pfam domain PF00412 LIM domaincontains similarity to Interpro domain IPR001781 (LIM, zinc-binding)
F22B5.10		0	0	1	Predicted membrane protein	ENSG00000143183	contains similarity to Pfam domain PF05809 Eukaryotic protein of unknown function (DUF841)contains similarity to Interpro domain IPR008559 (Protein of unknown function DUF841, eukaryotic)
F25B3.1	ehbp-1	0	0	1	Actin binding domain		contains similarity to Pfam domain PF00307 Calponin homology (CH) domaincontains similarity to Interpro domain IPR001715 (Calponin-like actin-binding)
F32B5.7		0	0	1			contains similarity to Pfam domain PF07173 Protein of unknown function (DUF1399)contains similarity to Interpro domains IPR009836 (Protein of unknown function DUF1399), IPR006058 (2Fe-2S ferredoxin, iron-sulfur binding site)
F37B1.2	gst-12	0	0	1	Glutathione S-transferase		contains similarity to Pfam domains PF00043 (Glutathione S-transferase, C-terminal domain), PF02798 (Glutathione S-transferase, N-terminal domain)contains similarity to Interpro domains IPR005955 (Maleylacetoacetate isomerase), IPR012335 (Thioredoxin fold), IPR004046 (Glutathione S-transferase, C-terminal), IPR004045 (Glutathione S-transferase, N-terminal)
F42G8.4	pmk-3	0	0	1	Protein kinase		contains similarity to Pfam domain PF00069 Protein kinase domaincontains similarity to Interpro domains IPR002290 (Serine/threonine protein kinase), IPR001245 (Tyrosine protein kinase), IPR003527 (MAP kinase), IPR000719 (Protein kinase, core)
F43E2.4	haf-2	0	0	1	Membrane transport protein	ENSG00000150967	contains similarity to Pfam domains PF00664 (ABC transporter transmembrane region), PF00005 (ABC transporter)contains similarity to Interpro domains IPR010132 (Type I secretion system ATPase, HlyB), IPR005286 (Cell division ATP-binding protein FtsE), IPR014137 (Nickel import ATP-binding protein NikE), IPR005896 (Glucan exporter ATP-binding protein), IPR005897 (Peptidase C39, ABC-type bacteriocin …
F46F11.1		0	0	1		ENSG00000145725	contains similarity to Pfam domain PF00328 Histidine acid phosphatasecontains similarity to Interpro domain IPR000560 (Histidine acid phosphatase)
F48E3.1	gly-12	0	0	1	Alpha-1,3-mannosyl-glycoprotein beta-1, 2-N-acetylglucosaminyltransferase I		contains similarity to Pfam domain PF03071 GNT-I familycontains similarity to Interpro domain IPR004139 (Glycosyl transferase, family 13)
F52A8.4		0	0	1	Globin like		contains similarity to Pfam domain PF00042 Globincontains similarity to Interpro domains IPR000971 (Globin), IPR012292 (Globin-related)
F52C12.5	elt-6	0	0	1	GATA-4/5/6 transcription factors		contains similarity to Pfam domain PF00320 GATA zinc fingercontains similarity to Interpro domain IPR000679 (Zinc finger, GATA-type)
F56B3.10	gst-40	0	0	1	Glutathione S-transferase	ENSG00000163106	contains similarity to Pfam domains PF00043 (Glutathione S-transferase, C-terminal domain), PF02798 (Glutathione S-transferase, N-terminal domain)contains similarity to Interpro domains IPR012335 (Thioredoxin fold), IPR004046 (Glutathione S-transferase, C-terminal), IPR004045 (Glutathione S-transferase, N-terminal)
H15N14.2	nsf-1	0	0	1	Vesicular-fusion protein NSF	ENSG00000073969	contains similarity to Pfam domains PF00004 (ATPase family associated with various cellular activities (AAA)), PF02359 (Cell division protein 48 (CDC48), N-terminal domain), PF02933 (Cell division protein 48 (CDC48), domain 2)contains similarity to Interpro domains IPR003959 (AAA ATPase, core), IPR003338 (AAA ATPase VAT, N-terminal), IPR005937 (26S proteasome subunit P45), IPR005936 (Peptidase M4…
K05F1.5		0	0	1	Zn-finger protein	ENSG00000145826	contains similarity to Pfam domain PF01551 Peptidase family M23contains similarity to Interpro domains IPR002886 (Peptidase M23B), IPR008663 (Leukocyte cell-derived chemotaxin 2), IPR007087 (Zinc finger, C2H2-type)
K06A1.5		0	0	1			contains similarity to Pfam domain PF00400 WD domain, G-beta repeatcontains similarity to Interpro domain IPR001680 (WD40 repeat)
K07H8.1		0	0	1	Beta-tubulin folding cofactor E	ENSG00000116957	contains similarity to Pfam domains PF00560 (Leucine Rich Repeat)(2), PF01302 (CAP-Gly domain)contains similarity to Interpro domains IPR001611 (Leucine-rich repeat), IPR000938 (CAP-Gly)
K11D9.2	sca-1	0	0	1	E1-E2 ATPases	ENSG00000196296	contains similarity to Pfam domains PF00690 (Cation transporter/ATPase, N-terminus), PF00689 (Cation transporting ATPase, C-terminus), PF00122 (E1-E2 ATPase), PF00702 (haloacid dehalogenase-like hydrolase)contains similarity to Interpro domains IPR005775 (ATPase, P-type cation exchange, alpha subunit, eukaryotic), IPR008250 (E1-E2 ATPase-associated region), IPR004014 (ATPase, P-type cation-transp…
R02F2.7		0	0	1			contains similarity to Human rotavirus A Outer capsid protein VP4.; TR:Q9E3V4
R06F6.2		0	0	1	Vacuolar biogenesis protein (pep5)	ENSG00000160695	contains similarity to Interpro domains IPR001841 (Zinc finger, RING-type), IPR000547 (Clathrin, heavy chain/VPS, 7-fold repeat)
R119.3		0	0	1	Dehydrogenase		contains similarity to Pfam domain PF00106 short chain dehydrogenasecontains similarity to Interpro domains IPR014058 (Pteridine reductase), IPR002347 (Glucose/ribitol dehydrogenase), IPR002198 (Short-chain dehydrogenase/reductase SDR), IPR011294 (3-hydroxybutyrate dehydrogenase), IPR014007 (Acetoin reductase), IPR011286 (2-deoxy-D-gluconate 3-dehydrogenase), IPR011283 (Acetoacetyl-CoA reductase)…
R12E2.9	inx-15	0	0	1	Innexin-type channels		contains similarity to Pfam domain PF00876 Innexincontains similarity to Interpro domain IPR000990 (Innexin)
T01G9.6	kin-10	0	0	1	Casein kinase II regulatory subunit	ENSG00000204435	contains similarity to Pfam domain PF01214 Casein kinase II regulatory subunitcontains similarity to Interpro domain IPR000704 (Casein kinase II, regulatory subunit)
T09A5.5		0	0	1			contains similarity to Dictyostelium discoideum AX4 Putative NADH dehydrogenase (Ubiquinone).; TR:Q1ZXN5
T14A8.2		0	0	1			contains similarity to Lodderomyces elongisporus Putative uncharacterized protein.; TR:A5DYU9
T20H4.5		0	0	1	Mitochondrial complex I 23K chain	ENSG00000110717	contains similarity to Pfam domain PF00037 4Fe-4S binding domaincontains similarity to Interpro domains IPR004497 (NADH-plastoquinone oxidoreductase, subunit I), IPR009157 (Ferredoxin zinc-binding), IPR001450 (4Fe-4S ferredoxin, iron-sulfur binding), IPR010226 (NADH-quinone oxidoreductase, chain I), IPR011898 (2-oxoacid:acceptor oxidoreductase, delta subunit, pyruvate/2-ketoisovalerate)
W04A8.4		0	0	1			contains similarity to Pfam domain PF01612 3'-5' exonucleasecontains similarity to Interpro domain IPR002562 (3'-5' exonuclease)
W06D4.1	hgo-1	0	0	1	HOMOGENTISATE 1,2-DIOXYGENASE (EC 1.13.11.5) (HOMOGENTISICASE) (HOMOGENTISATE OXYGENASE) (HOMOGENTISIC ACID OXIDASE)	ENSG00000215729	contains similarity to Pfam domain PF04209 homogentisate 1,2-dioxygenasecontains similarity to Interpro domain IPR005708 (Homogentisate 1,2-dioxygenase)
W08D2.4	fat-3	0	0	1	Delta 6-fatty acid desaturase/delta-8 sphingolipid desaturase	ENSG00000134824	contains similarity to Pfam domains PF00487 (Fatty acid desaturase), PF00173 (Cytochrome b5-like Heme/Steroid binding domain)contains similarity to Interpro domains IPR002345 (Lipocalin), IPR010257 (Fatty acid desaturase subdomain), IPR001199 (Cytochrome b5), IPR012171 (Fatty acid desaturase/sphingolipid desaturase), IPR005804 (Fatty acid desaturase), IPR012261 (Fatty acid acyl-CoA desaturase)
Y110A7A.13	chp-1	0	0	1	Zn2+-binding protein Melusin/RAR1, contains CHORD domain	ENSG00000110172	contains similarity to Pfam domains PF04969 (CS domain), PF04968 (CHORD)(2)contains similarity to Interpro domains IPR007051 (CHORD), IPR007052 (CS)
Y113G7B.17		0	0	1	Protein arginine N-methyltransferase PRMT1 and related enzymes	ENSG00000126457	contains similarity to Pfam domain PF08242 Methyltransferase domaincontains similarity to Interpro domains IPR013217 (Methyltransferase type 12), IPR013126 (Heat shock protein 70)
Y17G7B.7	tpi-1	0	0	1	Triosephosphate isomerase	ENSG00000111669	contains similarity to Pfam domain PF00121 Triosephosphate isomerasecontains similarity to Interpro domains IPR000652 (Triosephosphate isomerase), IPR013785 (Aldolase-type TIM barrel)
Y43H11AL.3	pqn-85	0	0	1	Sister chromatid cohesion protein SCC2/Nipped-B	ENSG00000164190	contains similarity to Interpro domains IPR012011 (von Willebrand factor), IPR000357 (HEAT), IPR011989 (Armadillo-like helical)
Y54E10BR.4		0	0	1	Predicted RNA-binding protein Nob1p involved in 26S proteasome assembly	ENSG00000141101	contains similarity to Pfam domain PF08772 Nin one binding (NOB1) Zn-ribbon likecontains similarity to Interpro domain IPR014881 (Nin one binding (NOB1) Zn-ribbon like)
Y75B8A.5		0	0	1	Leucine Rich Repeat (2 copies)		contains similarity to Interpro domain IPR000372 (Leucine-rich repeat, cysteine-rich flanking region, N-terminal)
ZC395.8	ztf-8	0	0	1			contains similarity to Pfam domain PF00096 Zinc finger, C2H2 typecontains similarity to Interpro domain IPR007087 (Zinc finger, C2H2-type)
ZC518.2	sec-24.2	0	0	1	Yeast YIK9 like	ENSG00000138802	contains similarity to Pfam domains PF04811 (Sec23/Sec24 trunk domain), PF04815 (Sec23/Sec24 helical domain), PF04810 (Sec23/Sec24 zinc finger), PF08033 (Sec23/Sec24 beta-sandwich domain), PF00626 (Gelsolin repeat)contains similarity to Interpro domains IPR006896 (Sec23/Sec24 trunk region), IPR007123 (Gelsolin region), IPR006900 (Sec23/Sec24 helical region), IPR000694 (Proline-rich region), IPR01…
ZK328.2	eft-1	0	0	1	Elongation factor 2	ENSG00000108883	contains similarity to Pfam domains PF03764 (Elongation factor G, domain IV), PF03144 (Elongation factor Tu domain 2), PF00009 (Elongation factor Tu GTP binding domain), PF00679 (Elongation factor G C-terminus)contains similarity to Interpro domains IPR000795 (Protein synthesis factor, GTP-binding), IPR005517 (Translation elongation factor EFG/EF2, domain IV), IPR004161 (Translation elongation fa…
ZK593.1		0	0	1	Pyruvate kinase	ENSG00000067225	contains similarity to Pfam domains PF02887 (Pyruvate kinase, alpha/beta domain), PF00224 (Pyruvate kinase, barrel domain)contains similarity to Interpro domains IPR001697 (Pyruvate kinase), IPR015794 (Pyruvate kinase, alpha/beta), IPR015793 (Pyruvate kinase, barrel)
ZK652.2	tomm-7	0	0	1	Translocase of outer mitochondrial membrane complex, subunit TOM7	ENSG00000196683	contains similarity to Pfam domain PF08038 TOM7 familycontains similarity to Interpro domain IPR012621 (Mitochondrial import translocase, subunit Tom7)
ZK822.5		0	0	1	Sodium/proline symporter like	ENSG00000139357	contains similarity to Pfam domain PF00474 Sodium:solute symporter familycontains similarity to Interpro domains IPR011849 (Sodium/pantothenate symporter), IPR001734 (Na+/solute symporter), IPR011851 (Sodium/proline symporter)
C29F5.7		0	0	1	Globins and related hemoproteins		contains similarity to Pfam domain PF00042 Globincontains similarity to Interpro domains IPR000971 (Globin), IPR012292 (Globin-related)
C50F2.4		0	0	1			contains similarity to Chlamydia trachomatis A/G-specific Adenine Glycosylase.; TR:O84109
ZC487.1		0	0	1			contains similarity to Interpro domain IPR011761 (ATP-grasp fold)
ZK1236.7		0	0	1	Uncharacterized conserved protein	ENSG00000198171	contains similarity to Drosophila pseudoobscura GA19186-PA (Fragment).; TR:Q295B1
ZK563.4	clc-3	0	0	1			contains similarity to Xenopus laevis MGC84082 protein.; TR:Q6GM02

## Sheet: embscreen
Dataset S6. Genes identified by RNAi
Muscle affecting genes identified by RNAi screen for the Pat phenotype
Sequence Name	Gene Name (CGC)	CDS Description	Human Ensembl Gene ID	CDS Remarks
T28B4.3	ttr-6			contains similarity to Pfam domain PF01060 Transthyretin-like familycontains similarity to Interpro domain IPR001534 (Transthyretin-like)
F31D5.3	tag-149			contains similarity to Drosophila melanogaster Flybase gene name is CG32133-PA; FLYBASE:CG32133-PA
T27B1.2	ztf-19	zinc finger		contains similarity to Pfam domain PF00096 Zinc finger, C2H2 typecontains similarity to Interpro domain IPR007087 (Zinc finger, C2H2-type)
F25B3.6			ENSG00000137815	contains similarity to Pfam domain PF03126 Plus-3 domaincontains similarity to Interpro domain IPR004343 (Plus-3)

## Sheet: -
	aggregates+clumps	1	1
	clumps	13	6
	aggregates	22	3
	disorganized	82	4
